# Supplementary material for: Drought Responses of Foliar Metabolites in Three Maize Hybrids Differing in Water Stress Tolerance
Source: PLoS One. 2013 Oct 15;8(10):e77145. doi: 10.1371/journal.pone.0077145 (PMC3797120; doi:10.1371/journal.pone.0077145)
Supplement: Table S1 — ANOVA comparisons (tests of pair-wise interactions) for the effects of time of drought treatment on foliar responses of three maize genotypes differing in drought tolerance. For analysis, day 0 to 6, day 9 to 12, and day 15 to19 were combined, respectively. Genotypes were tolerant (T), intermediate (I) or susceptible (S) to water stress. Metabolite abbreviations were as in Figure 2. *, P ≤ 0.05; **, P ≤ 0.01; ns, P > 0.05. (DOC) [file pone.0077145.s001.doc]

Supplementary Table 1. ANOVA comparisons (tests of pair-wise interactions) for the effects of time of drought treatment on foliar responses of three maize genotypes differing in drought tolerance. For analysis, day 0 to 6, day 9 to 12, and day 15 to19 were combined, respectively.Genotypes were tolerant (T), intermediate (I) or susceptible (S) to water stress. Metabolite abbreviations were as in Figure 2. *, *P* ≤ 0.05; **, *P* ≤ 0.01; ns, *P* > 0.05.

|  | DAY | To Day 6 | | | To Day 12 | | | To Day 19 | | |
| --- | --- | --- | --- | --- | --- | --- | --- | --- | --- | --- |
| Geno | T vs I | I vs S | T vs S | T vs I | I vs S | T vs S | T vs I | I vs S | T vs S |
| Physiol. | LWP | ns | ns | ns | ** | ns | ** | ** | ns | ** |
| SWC | ns | ns | ns | ns | ns | ** | ** | ns | ** |
| Gs | * | ns | ns | ** | ns | ** | ** | ns | ** |
| Pn | ns | ns | ns | ** | ** | ** | ** | ** | ** |
| Carbohydrates | Fru | ns | ns | ns | ns | ns | ns | ** | ns | ** |
| Glc | ns | ns | ns | ** | ** | ** | * | ns | * |
| Raff | ns | ns | ns | ** | * | ns | * | ** | ** |
| Rib | ns | ns | * | ** | ** | ns | ** | ** | ** |
| Suc | ** | ns | ** | ns | ** | ** | ** | ns | ** |
| Stch | ns | ns | ns | ** | ** | ** | ** | ns | ** |
| Organic acids | aKG | ns | ** | ns | ns | ns | * | ns | ns | ns |
| Fum | ns | ns | ns | ns | ns | ns | ns | ** | ** |
| Succ | ns | ns | ns | ns | ns | ns | ns | ns | ns |
| Mal | ns | ns | ns | ** | ** | ns | * | ** | ** |
| CIt | * | ns | ns | * | ** | * | * | ns | ns |
| Shik | ns | ns | ns | ns | ** | ** | * | ** | ns |
| Amino acids | Pro | ns | ns | ns | ns | ns | ns | ** | ** | ** |
| Asp | ** | ns | ** | ns | ns | ns | ns | ns | ns |
| Ala | ns | ns | ** | * | ns | ns | ns | ns | ns |
| Glu | ** | ns | ** | ns | ns | ns | ns | ns | * |
| Val | ns | ns | ns | ns | ** | ns | ns | ns | ns |
| Lys | ns | ns | ns | ns | ns | ns | ns | ns | ns |
| His | ns | ns | ns | ns | ns | ns | ** | ns | ** |
| Asn | ns | ns | ns | ns | ns | ns | ** | ** | ** |
| Leu | ns | ns | ns | ns | ns | * | ** | ** | ns |
| Ile | ns | ns | * | ns | ns | ns | ns | ns | ns |
| Tyr | ns | ns | * | ns | ns | ns | ** | * | ns |
| Phe | ns | ns | ns | ns | ns | ns | ** | ns | ** |
| Cys | ns | ns | ns | ns | ns | ns | ** | ** | ** |
| Ser | ns | * | ns | * | ns | ** | ** | * | ** |
